# Supplementary material for: Galactosylated reduction and pH dual-responsive triblock terpolymer Gal-PEEP-a-PCL-ss-PDMAEMA: a multifunctional carrier for the targeted and simultaneous delivery of doxorubicin and DNA
Source: Royal Society of Chemistry journal article supplement (doi:10.1039/c4py00538d), 2014-01-01
Supplement: c4py00538d1.pdf [file c4py00538d1.pdf]

## Electronic Supplementary Information (ESI)

for

# Galactosylated Reduction and pH Dual-Responsive Triblock Terpolymer Gal-PEEP-*α*-PCL-*ss*-PDMAEMA: a Multifunctional Carrier for Targeted and Simultaneous Delivery of Doxorubicin and DNA

*Yang Zhang, Jinlin He, \* Dongling Cao, Mingzu Zhang and Peihong Ni\**

College of Chemistry, Chemical Engineering and Materials Science, Jiangsu Key  
Laboratory of Advanced Functional Polymer Design and Application, Soochow  
University, Suzhou 215123, China.

Email: [phni@suda.edu.cn](mailto:phni@suda.edu.cn) (P. H. Ni) or [jlhe@suda.edu.cn](mailto:jlhe@suda.edu.cn) (J. L. He);

Tel: +86-512-65882047.

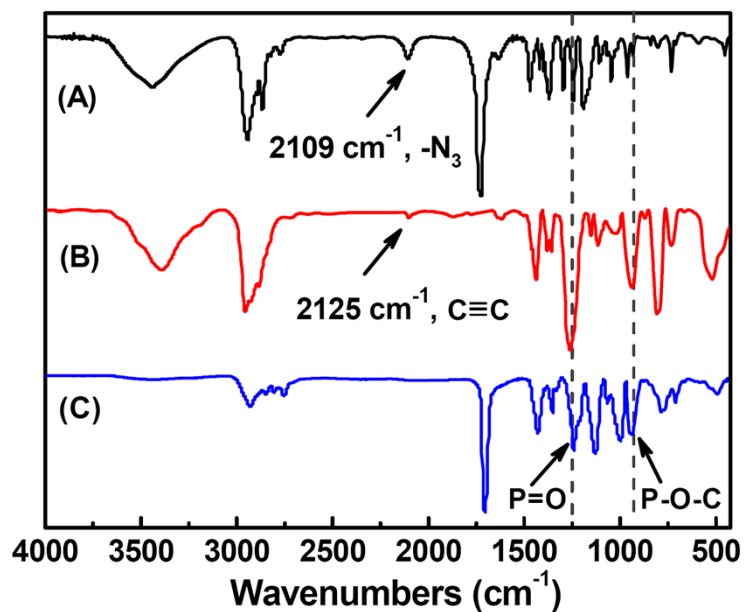

**Fig. S1** FT-IR spectra of (A)  $N_3$ -*a*-PCL<sub>57</sub>-*ss*-PDMAEMA<sub>28</sub>, (B) Propargyl-PEEP<sub>33</sub> and (C) Gal-PEEP<sub>33</sub>-*a*-PCL<sub>57</sub>-*ss*-PDMAEMA<sub>28</sub>.

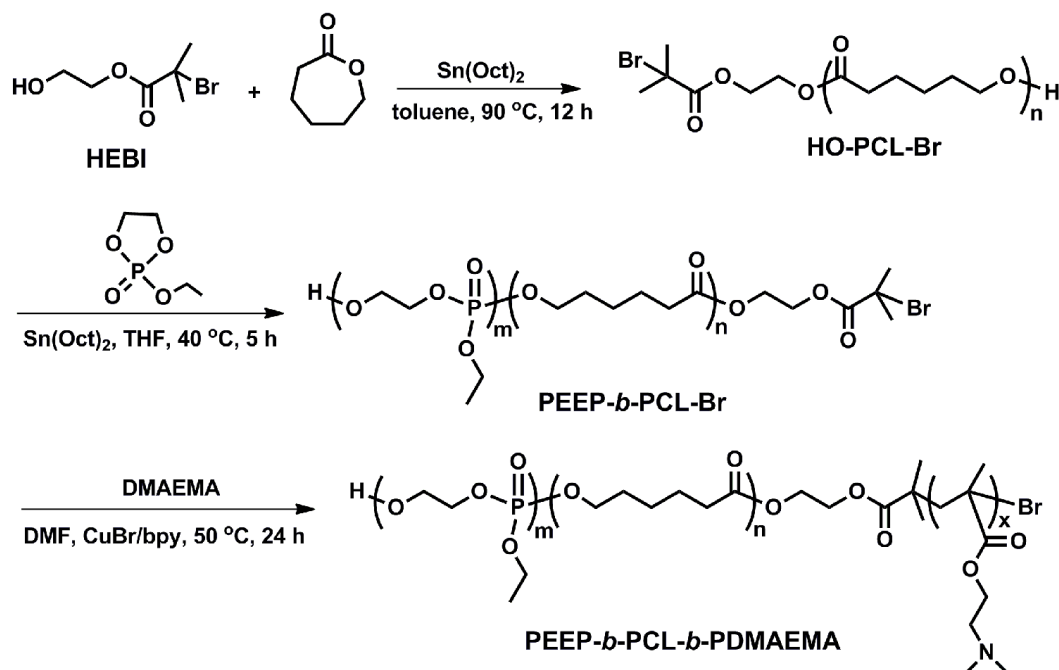

**Scheme S1** Synthesis route of triblock terpolymer PEEP-*b*-PCL-*b*-PDMAEMA without acetal and disulfide linkages.

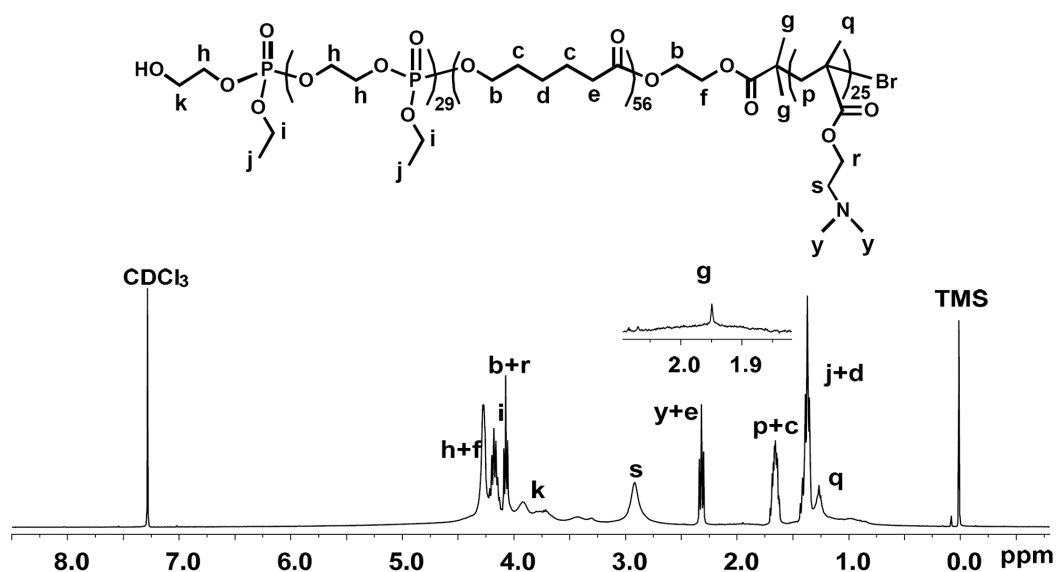

**Fig. S2** <sup>1</sup>H NMR spectrum of triblock terpolymer PEEP<sub>30</sub>-*b*-PCL<sub>56</sub>-*b*-PDMAEMA<sub>25</sub>.

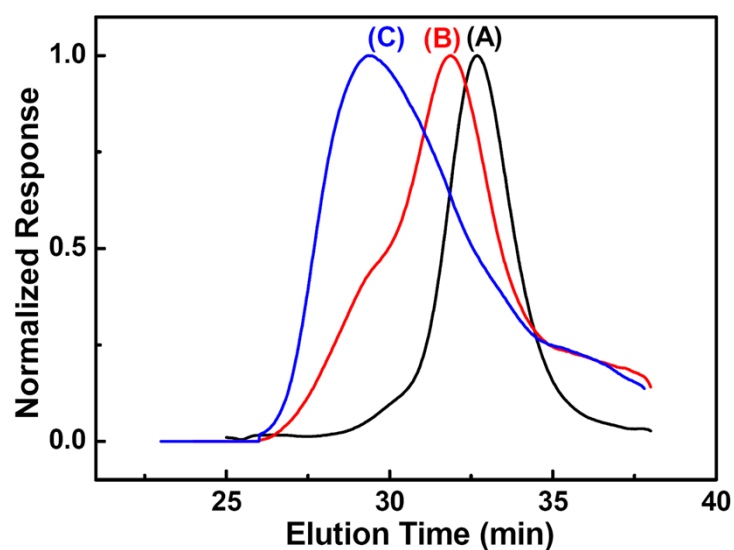

**Fig. S3** GPC curves of (A) HO-PCL<sub>56</sub>-Br ( $\overline{M}_{n, GPC} = 9870 \text{ g mol}^{-1}$ , PDI = 1.06), (B) PEEP<sub>30</sub>-*b*-PCL<sub>56</sub>-Br ( $\overline{M}_{n, GPC} = 11820 \text{ g mol}^{-1}$ , PDI = 1.12), and (C) PEEP<sub>30</sub>-*b*-PCL<sub>56</sub>-*b*-PDMAEMA<sub>25</sub> ( $\overline{M}_{n, GPC} = 15500 \text{ g mol}^{-1}$ , PDI = 1.15).

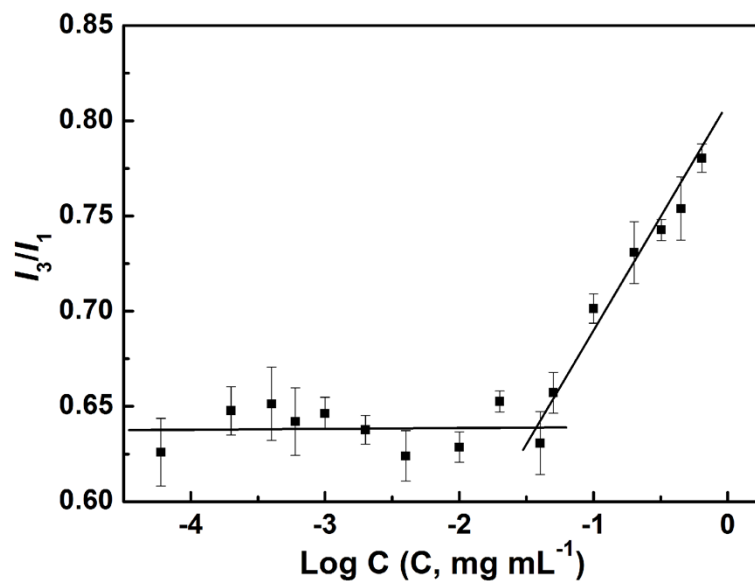

**Fig. S4** Intensity ratios ( $I_3/I_1$ ) in fluorescence emission spectra of pyrene as a function of logarithm concentrations of triblock terpolymer Gal-E<sub>33</sub>-*a*-C<sub>57</sub>-*ss*-D<sub>28</sub> in pH 7.4 buffer solution.

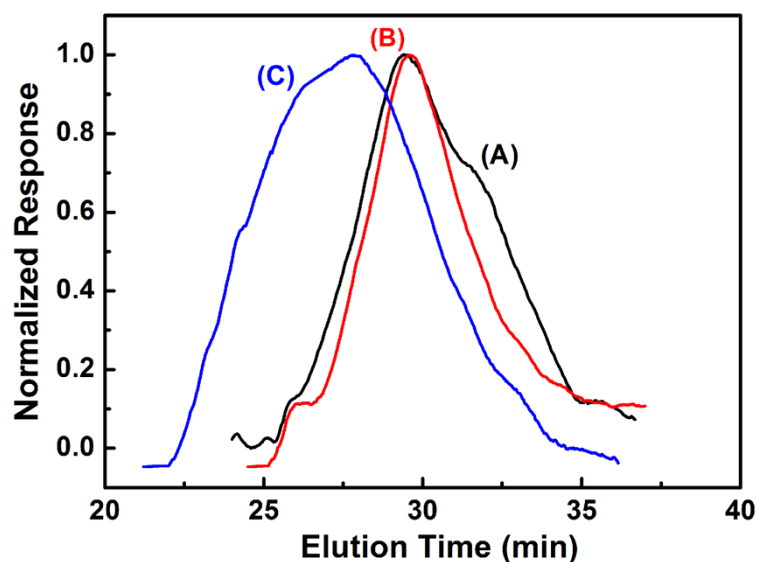

**Fig. S5** GPC curves of (A) GSH-triggered degradation products and (B) pH-triggered degradation products of Gal-E<sub>33</sub>-*a*-C<sub>57</sub>-*ss*-D<sub>28</sub>, as well as (C) the original Gal-E<sub>33</sub>-*a*-C<sub>57</sub>-*ss*-D<sub>28</sub>.

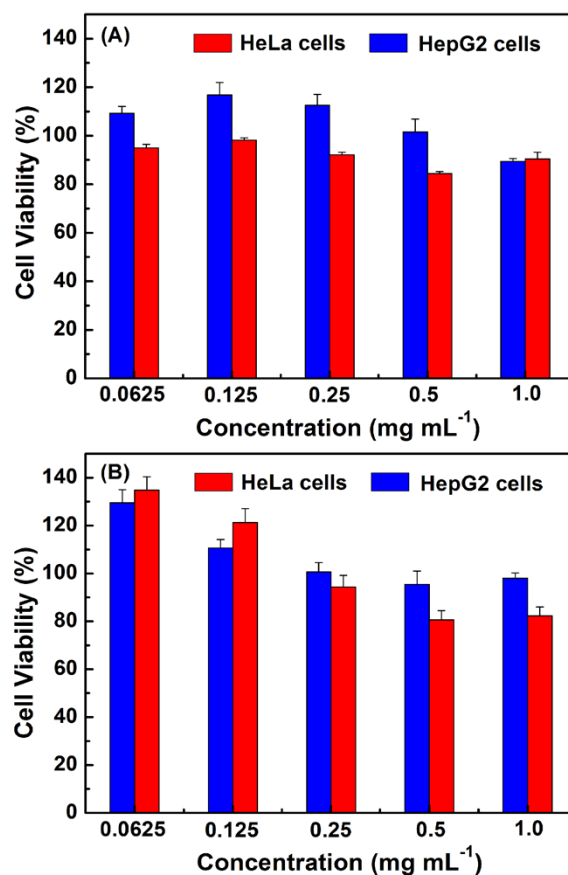

**Fig. S6** Cell viability of HeLa cells and HepG2 cells incubated with (A) GSH-triggered degradation products and (B) pH-triggered degradation products of Gal-E<sub>33</sub>-*a*-C<sub>57-ss</sub>-D<sub>28</sub> at various concentrations for 48 h.

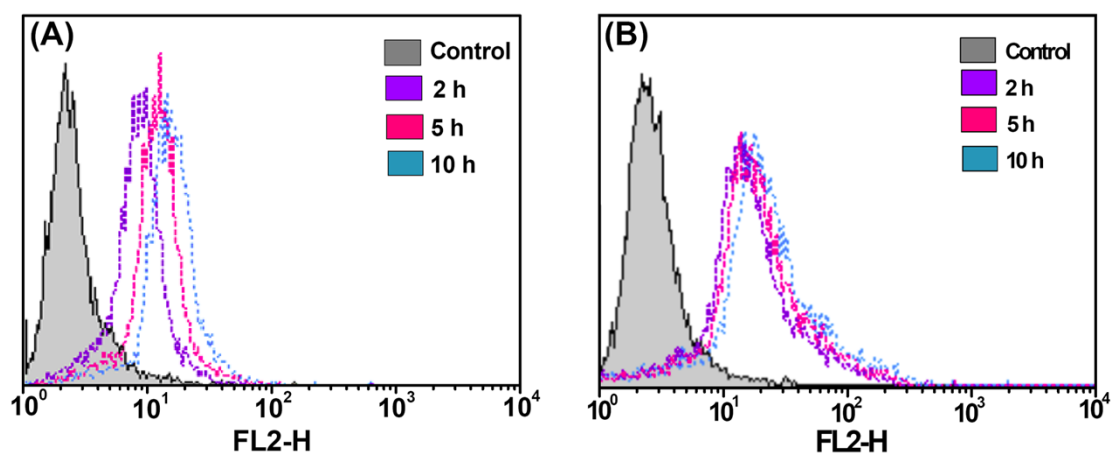

**Fig. S7** Flow cytometry profiles of (A) HeLa cells and (B) HepG2 cells treated with DOX-loaded Gal-E<sub>33</sub>-*a*-C<sub>57-ss</sub>-D<sub>28</sub> micelles (final DOX concentration was 0.3 mg L<sup>-1</sup>)

for different incubation time.
